# Supplementary material
Source: PubMed Central journal article supplement (PMC2666575)
Supplement: M808425200_2.pdf [file M808425200_2.pdf]

Supplementary table S1.

| <b>protein</b>                       | <b>Ab source or reference</b>    | <b>Change in ko PSD</b> |
|--------------------------------------|----------------------------------|-------------------------|
| <b>Postsynaptic scaffolds</b>        |                                  |                         |
| IRSp53                               | Soltau et al., 2004              | absent                  |
| PSD-95                               | Upstate                          | no                      |
| SAPAP1/GKAP                          | Stefan Kindler, Hamburg, Germany | no                      |
| Homer                                | Carlo Sala, Milano, Italy        | no                      |
| Shank1+Shank2                        | Zitzer et al., 1999              | no                      |
| Shank3                               | Böckers et al., 1999             | no                      |
| Densin-180                           | Quitsch et al., 2005             | Increased               |
| sharpin                              | Eunjoon Kim, Daejeon, Korea      | no                      |
| <b>cytoskeleton</b>                  |                                  |                         |
| actin                                | Upstate                          | no                      |
| cortactin                            | Upstate                          | no                      |
| $\alpha$ -fodrin/ $\alpha$ -spectrin | Chemicon                         | no                      |
| Abp1/SH3p7/HIP-55                    | Abcam                            | no                      |
| <b>G-proteins and signalling</b>     |                                  |                         |
| cdc42                                | BD Biosciences                   | no                      |
| rac                                  | Upstate                          | no                      |
| rho                                  | Santa Cruz                       | no                      |
| rap1                                 | BD Biosciences                   | no                      |
| Ras                                  | BD Biosciences                   | no                      |
| betaPIX                              | Chemicon                         | no                      |
| PAK                                  | Santa Cruz                       | no                      |
| $\delta$ -catenin                    | BD Biosciences                   | no                      |
| Mena                                 | BD Biosciences                   | no                      |
| Eps8                                 | BD Biosciences                   | no                      |
| WAVE2                                | Upstate                          | no                      |
| Abi-1                                | MBL International                | no                      |
| Sos                                  | BD Biosciences                   | no                      |
| $\alpha$ CaMKII                      | Chemicon                         | no                      |
| $\alpha$ CaMKII (Thr286-phospho)     | Cell Signaling Technologies      | no                      |
| Arc/arg3.1                           | BD Biosciences                   | no                      |
| <b>Transmitter receptors</b>         |                                  |                         |
| NMDAR1                               | Chemicon                         | increased               |
| NMDAR2A/B                            | Chemicon                         | increased               |
| NMDAR2B                              | Affinity Bioreagents             | increased               |
| NMDAR2A                              | Chemicon                         | increased               |
| GluR1                                | Chemicon                         | no                      |
| mGluR5                               | Carlo Sala, Milano, Italy        | no                      |
| stargazin                            | Upstate                          | no                      |

List of antibodies which were used for quantification of proteins in PSD from wt and IRSp53 deficient animals
